# Supplementary material
Source: PubMed Central journal article supplement (PMC4523063)
Supplement: NIHMS710148-supplement-Online_only_supplementary_materials.pdf [file NIHMS710148-supplement-Online_only_supplementary_materials.pdf]

**Appendix A. Search Terms Used in the Systematic Review**

| Concept                       | Search terms                                                                                                                                                                                                  |
|-------------------------------|---------------------------------------------------------------------------------------------------------------------------------------------------------------------------------------------------------------|
| <b>PubMed search terms</b>    |                                                                                                                                                                                                               |
| Family planning               | “Family Planning Services”[Mesh] OR “Family Planning Policy”[Mesh] OR “Reproductive Health Services”[Mesh] OR “Family Planning” OR (“Title X”) OR (“Planned Parenthood”)                                      |
| Contraception                 | “Contraception”[Mesh] OR “Contraceptive Agents”[Mesh] OR “Contraceptive Devices”[Mesh] OR (“Birth control”) OR “Contraception Behavior”[Mesh]                                                                 |
| Counseling                    | “Counseling”[Mesh]                                                                                                                                                                                            |
| Education                     | “Health Education”[Mesh] OR “Health Education”[All Fields] OR (“Health Educator”)                                                                                                                             |
| Follow-up/Continuity of care  | “continuity of patient care”[Mesh] OR “followup”[All fields] OR “follow up”[All fields]                                                                                                                       |
| <b>PsychINFO search terms</b> |                                                                                                                                                                                                               |
| Family planning               | ( DE "Family Planning" OR DE "Birth Control" OR DE "Family Planning Attitudes" ) or "family planning" or "Planned parenthood" or "title X" or "birth control"                                                 |
| Counseling or education       | ( (DE "Counseling" OR DE "Group Counseling" OR DE "Peer Counseling") OR (DE "Health Education") ) or (behavi* OR "Reproductive life plan" OR education)                                                       |
| <b>CINAHL search terms</b>    |                                                                                                                                                                                                               |
| Family planning               | (MH "Family Planning+") OR family planning OR (MH "Family Planning Policy") OR planned parenthood OR (title x)                                                                                                |
| Contraception                 | ( (MH "Contraception+") OR contraception OR (MH "Contraceptive Agents+") OR (MH "Contraceptive Devices+") OR (MH "Family Planning: Contraception (Iowa NIC)") ) or (birth control)                            |
| Counseling or education       | ( (MH "Counseling+") OR counseling OR (MH "Counseling Service (Saba CCC)+") OR (MH "Sexual Counseling") OR (MH "Reproductive Health") OR (MH "Health Education") ) or (education or "Reproductive life plan") |

**Appendix B. Electronic Databases Searched in the Systematic Review**

| <b>Database</b>                                                      | <b>URL for search platform</b>                                                                                    |
|----------------------------------------------------------------------|-------------------------------------------------------------------------------------------------------------------|
| <b>Cumulative Index to Nursing and Allied Health Literature</b>      | <a href="http://ebscohost.com/">http://ebscohost.com/</a>                                                         |
| <b>The Campbell Library</b>                                          | <a href="http://www.campbellcollaboration.org/library.php">http://www.campbellcollaboration.org/library.php</a>   |
| The Cochrane Library                                                 | <a href="http://www.thecochranelibrary.com">www.thecochranelibrary.com</a>                                        |
| Database of Abstracts of Reviews of Effects                          | <a href="http://www.crd.york.ac.uk/crdweb/">http://www.crd.york.ac.uk/crdweb/</a>                                 |
| EMBASE                                                               | <a href="http://ebscohost.com/">http://ebscohost.com/</a>                                                         |
| MEDLINE                                                              | <a href="http://ebscohost.com/">http://ebscohost.com/</a>                                                         |
| PsycINFO                                                             | <a href="http://www.apa.org/psychinfo">www.apa.org/psychinfo</a>                                                  |
| PubMed (pre MEDLINE)                                                 | <a href="http://ebscohost.com/">http://ebscohost.com/</a>                                                         |
| U.K. National Health Service Economic Evaluation Database            | <a href="http://www.crd.york.ac.uk/crdweb/">http://www.crd.york.ac.uk/crdweb/</a>                                 |
| U.S. National Guideline Clearinghouse                                | <a href="http://www.guidelines.gov">www.guidelines.gov</a>                                                        |
| HealthSTAR                                                           | <a href="http://www.kfinder.com/newweb/Products/hstar.html">http://www.kfinder.com/newweb/Products/hstar.html</a> |
| POPLINE                                                              | <a href="http://www.popline.org/">http://www.popline.org/</a>                                                     |
| Education Resource Information Center                                | <a href="http://www.eric.ed.gov/">http://www.eric.ed.gov/</a>                                                     |
| UK National Institute of Clinical Excellence                         | <a href="http://www.nice.org.uk/">http://www.nice.org.uk/</a>                                                     |
| Evidence for Policy and Practice Information and Coordinating Centre | <a href="http://eppi.ioe.ac.uk/cms/">http://eppi.ioe.ac.uk/cms/</a>                                               |
| TRIP                                                                 | <a href="http://tripdatabase.com/">http://tripdatabase.com/</a>                                                   |

**Appendix**  
**Impact of Reminder Systems in Clinical Settings to Improve Family Planning Outcomes: A Systematic Review**  
**Zapata et al.**

**Appendix C. Evidence on Impact of Reminder Systems in Clinical Settings to Improve Family Planning Outcomes**

| Reference/<br>Funding                                                                                                                                    | Design/Setting                                                                                                                                                                                              | Population                                                                                                                                                                                                                                                                                                                                                                                                                   | Intervention                                                                                                                                                                                                                                                                                                                                                                               | Outcomes                                                                                                                | Results                                                                                                                                                                                                                                                                                                                                                                                                                                                                                                                                                                                                            | Quality                                                                                                                                                                                                                                                                                                                                                                                                                             |
|----------------------------------------------------------------------------------------------------------------------------------------------------------|-------------------------------------------------------------------------------------------------------------------------------------------------------------------------------------------------------------|------------------------------------------------------------------------------------------------------------------------------------------------------------------------------------------------------------------------------------------------------------------------------------------------------------------------------------------------------------------------------------------------------------------------------|--------------------------------------------------------------------------------------------------------------------------------------------------------------------------------------------------------------------------------------------------------------------------------------------------------------------------------------------------------------------------------------------|-------------------------------------------------------------------------------------------------------------------------|--------------------------------------------------------------------------------------------------------------------------------------------------------------------------------------------------------------------------------------------------------------------------------------------------------------------------------------------------------------------------------------------------------------------------------------------------------------------------------------------------------------------------------------------------------------------------------------------------------------------|-------------------------------------------------------------------------------------------------------------------------------------------------------------------------------------------------------------------------------------------------------------------------------------------------------------------------------------------------------------------------------------------------------------------------------------|
| <b>OC users</b>                                                                                                                                          |                                                                                                                                                                                                             |                                                                                                                                                                                                                                                                                                                                                                                                                              |                                                                                                                                                                                                                                                                                                                                                                                            |                                                                                                                         |                                                                                                                                                                                                                                                                                                                                                                                                                                                                                                                                                                                                                    |                                                                                                                                                                                                                                                                                                                                                                                                                                     |
| Fox (2003) <sup>8</sup><br><br>Magee-<br>Womens<br>Hospital,<br>University<br>of<br>Pittsburgh,<br>General<br>Clinical<br>Research<br>Center<br><br>U.S. | Retrospective<br>historical CT; 2<br>study groups<br><br>Physician<br>practices,<br>hospital offices,<br>family planning<br>clinics and<br>university<br>health centers,<br>Pennsylvania<br><br>FU=3 months | Intervention<br>group: 50<br>sexually active<br>women aged 18–<br>37 years (median<br>age 21); new OC<br>users; 84%<br>white, 12%<br>black, 6% NH;<br>72% full time<br>students<br><br>Returned diaries<br>at 3 months FU:<br><i>n</i> =40<br><br>Historical<br>control group<br>participating in a<br>OC adherence<br>study received<br>no reminders:<br><i>n</i> =103 (group<br>characteristics<br>NR)<br><br>Recruitment: | Daily reminder e-mail<br>messages on OC<br>adherence sent at<br>~8:30am ± 30 minutes to<br>participants via blind<br>copy to maintain privacy;<br>participants instructed to<br>check email daily and<br>reply to reminder to<br>confirm receipt with<br>replies logged; diary cards<br>completed by participants<br>to measure OC adherence<br><br>High intensity<br><br>Frequency: daily | <u>Medium-term</u> :<br>increase correct use<br>of contraception<br>(OCs)<br><br><u>Other</u> : barriers for<br>clients | Perfect adherence (no<br>missed hormonal pills)<br>was significantly ( <b><i>p</i>&lt;0.05</b> )<br>higher for intervention vs<br>historical reference group<br>during all 3 cycles (cycle<br>1: 78% vs 58%; cycle 2:<br>80% vs 59%; cycle 3:<br>72% vs 53%)<br><br>Although 64% of<br>intervention participants<br>expressed desire to<br>continue receiving the<br>daily email reminders,<br>only 25% were willing to<br>pay \$5.00–\$10.00 per<br>month for the service;<br>participants also noted<br>that the reminders would<br>have been more helpful if<br>the time sent could have<br>been individualized | Level II-3; high risk for bias<br><br><u>Weaknesses</u> :<br>Selection bias<br><br>Comparability between study<br>groups unknown (potential<br>for confounding errors)<br><br>Comparability between<br>completers and<br>noncompleters unknown<br><br>Self report bias<br><br>Possible study reactivity<br>(outcome improves in<br>participants who are aware of<br>being observed)<br><br>Short FU time for behavioral<br>outcomes |

**Appendix**  
**Impact of Reminder Systems in Clinical Settings to Improve Family Planning Outcomes: A Systematic Review**  
**Zapata et al.**

| Reference/<br>Funding                                      | Design/Setting                                                                           | Population                                                                                                                                                                                                                                                                                                                                                                                                                                                                                        | Intervention                                                                                                                                                                                                                                                                                                                                                                                                                                                                         | Outcomes                                                                                                                 | Results                                                                                                                                                                                                                                                                                                                                                                                                                                                                                                                                                                                        | Quality                                                                                                                                                                                                                                                                                                                                                                                                                                                                                                                                                                                                                  |
|------------------------------------------------------------|------------------------------------------------------------------------------------------|---------------------------------------------------------------------------------------------------------------------------------------------------------------------------------------------------------------------------------------------------------------------------------------------------------------------------------------------------------------------------------------------------------------------------------------------------------------------------------------------------|--------------------------------------------------------------------------------------------------------------------------------------------------------------------------------------------------------------------------------------------------------------------------------------------------------------------------------------------------------------------------------------------------------------------------------------------------------------------------------------|--------------------------------------------------------------------------------------------------------------------------|------------------------------------------------------------------------------------------------------------------------------------------------------------------------------------------------------------------------------------------------------------------------------------------------------------------------------------------------------------------------------------------------------------------------------------------------------------------------------------------------------------------------------------------------------------------------------------------------|--------------------------------------------------------------------------------------------------------------------------------------------------------------------------------------------------------------------------------------------------------------------------------------------------------------------------------------------------------------------------------------------------------------------------------------------------------------------------------------------------------------------------------------------------------------------------------------------------------------------------|
| Hou (2011) <sup>9</sup><br>Anonymous<br>foundation<br>U.S. | RCT; 2 study<br>groups<br><br>Planned<br>Parenthood<br>clinic, Boston<br><br>FU=3 months | flyer and<br>newspaper<br>advertisements<br><br>82 sexually<br>active women<br>aged 18–31 years<br>randomized from<br>103 women<br>enrolled; new<br>OC users; 79%<br>White; 99%<br>completed HS<br><br>73/82 (89%) had<br>usable data at<br>end of data<br>collection<br><br>Intervention<br>group: <i>n</i> =37<br><br>Control group<br>received no<br>reminders: <i>n</i> =36<br><br>Recruitment:<br>women seeking<br>care at Planned<br>Parenthood<br>clinic were<br>invited to<br>participate | Daily reminder text<br>messages on OC<br>adherence sent at<br>designated time chosen by<br>participants; participants<br>were given an electronic<br>monitoring device and 3<br>cycles of OCs; electronic<br>monitoring devices<br>monitored pill taking by<br>sending wireless signal to<br>two servers (main and<br>backup) each time<br>participants opened the<br>devices to remove a pill;<br>diary cards were also<br>maintained<br><br>High intensity<br><br>Frequency: daily | <u>Medium-term</u> :<br>increase correct use<br>of contraception<br>(COCs)<br><br><u>Other</u> : barriers for<br>clients | Mean number of missed<br>COCs did not<br>significantly differ<br>between intervention and<br>control groups ( $4.9 \pm 3.0$<br>and $4.6 \pm 3.5$ per cycle,<br>respectively, with number<br>of missed pills increasing,<br>but not differentially<br>according to group, with<br>each cycle over 3 months<br>FU)<br><br>Although >85% expressed<br>that they would continue<br>or consider continuing to<br>use the reminder system,<br>43% would not pay for<br>the service; however, 57%<br>stated that they would pay<br>a median acceptable cost<br>of \$5.00 per month for the<br>service | Level I; moderate risk for<br>bias<br><br><u>Strengths</u> :<br>80% participation rate<br>89% completion rate<br><br>FU rate $\leq$ 15% different<br>between groups (90% for<br>intervention and 88% for<br>control groups)<br><br>Comparable study groups<br>related to age, marital status,<br>race/ethnicity, education,<br>gravidity, parity, prior OC<br>use, and prior use of<br>reminders<br><br>Objective measurement of<br>adherence (electronic<br>monitoring device)<br><br>Randomization assignment<br>was computer-generated<br><br>Investigators blinded to<br>group assignment<br><br><u>Weaknesses</u> : |

**Appendix**  
**Impact of Reminder Systems in Clinical Settings to Improve Family Planning Outcomes: A Systematic Review**  
**Zapata et al.**

| Reference/<br>Funding          | Design/Setting               | Population                                                                            | Intervention                                                                                                                                                                                                     | Outcomes                                                        | Results                                                                                                                                                                                    | Quality                                                                                                                                     |
|--------------------------------|------------------------------|---------------------------------------------------------------------------------------|------------------------------------------------------------------------------------------------------------------------------------------------------------------------------------------------------------------|-----------------------------------------------------------------|--------------------------------------------------------------------------------------------------------------------------------------------------------------------------------------------|---------------------------------------------------------------------------------------------------------------------------------------------|
|                                |                              |                                                                                       |                                                                                                                                                                                                                  |                                                                 |                                                                                                                                                                                            | Selection bias                                                                                                                              |
|                                |                              |                                                                                       |                                                                                                                                                                                                                  |                                                                 |                                                                                                                                                                                            | Possible study reactivity (outcome improves in participants who are aware of being observed)                                                |
|                                |                              |                                                                                       |                                                                                                                                                                                                                  |                                                                 |                                                                                                                                                                                            | Device did not mimic real-life OC dispenser                                                                                                 |
|                                |                              |                                                                                       |                                                                                                                                                                                                                  |                                                                 |                                                                                                                                                                                            | Short FU time for behavioral outcomes                                                                                                       |
| Lachowsky (2002) <sup>11</sup> | Cohort study; 2 study groups | 975 women seeking OC prescription (new and continuing users); 93% aged ≤30            | Distribution of a credit card-sized reminder device which emitted an audible beep at a time selected by the participant to aid in establishing OC dosing as a daily routine; adherence assessed via survey at FU | <u>Medium-term:</u> increase correct use of contraception (OCs) | Intervention group had a significantly ( $p<0.005$ ) higher rate of perfect OC adherence (no missed hormonal pills) during the preceding 3 months compared with control group (41% vs 19%) | Level II-3; high risk for bias                                                                                                              |
| Funding source not stated      | Setting: NR<br>FU=3-6 months |                                                                                       |                                                                                                                                                                                                                  |                                                                 |                                                                                                                                                                                            | <u>Weaknesses:</u><br>Selection bias (provider non-systematically determined study groups)                                                  |
| France                         |                              | Intervention group: $n=485$<br><br>Control group received no reminder device: $n=490$ | High intensity<br><br>Frequency: daily                                                                                                                                                                           |                                                                 |                                                                                                                                                                                            | Participation rate unknown<br><br>Study groups appear to differ related to age and past OC usage (although statistical tests not conducted) |
|                                |                              | Recruitment: invited to participate by 180 participating gynecologists                |                                                                                                                                                                                                                  |                                                                 |                                                                                                                                                                                            | Self report bias<br><br>Recall bias<br><br>Completion rate unknown<br><br>Short FU time for behavioral outcomes                             |
| <b>DMPA users</b>              |                              |                                                                                       |                                                                                                                                                                                                                  |                                                                 |                                                                                                                                                                                            |                                                                                                                                             |
| Keder (1998) <sup>10</sup>     | RCT; 2 study groups          | 250 sexually active women; new DMPA                                                   | A reminder letter was sent to DMPA users two weeks before the                                                                                                                                                    | <u>Medium-term:</u> increase correct use of contraception       | Rates of late and missed injections were similar                                                                                                                                           | Level I; moderate risk for bias                                                                                                             |

**Appendix**  
**Impact of Reminder Systems in Clinical Settings to Improve Family Planning Outcomes: A Systematic Review**  
**Zapata et al.**

| Reference/<br>Funding                                            | Design/Setting                                                              | Population                                                                                                                                                                                                                                                                 | Intervention                                                                                                                                                                                                                               | Outcomes                                                                                         | Results                                                                                                                                                                                                                                                                                                                                                                                                                                                                                                                           | Quality                                                                                                                                                                                                                                                                                                                                                                                                                                                                                                                             |
|------------------------------------------------------------------|-----------------------------------------------------------------------------|----------------------------------------------------------------------------------------------------------------------------------------------------------------------------------------------------------------------------------------------------------------------------|--------------------------------------------------------------------------------------------------------------------------------------------------------------------------------------------------------------------------------------------|--------------------------------------------------------------------------------------------------|-----------------------------------------------------------------------------------------------------------------------------------------------------------------------------------------------------------------------------------------------------------------------------------------------------------------------------------------------------------------------------------------------------------------------------------------------------------------------------------------------------------------------------------|-------------------------------------------------------------------------------------------------------------------------------------------------------------------------------------------------------------------------------------------------------------------------------------------------------------------------------------------------------------------------------------------------------------------------------------------------------------------------------------------------------------------------------------|
| Funding source not stated<br><br>U.S.                            | Magee-Womens Hospital clinic, Pennsylvania<br><br>FU=1 year or 4 injections | users; mean age 20.7 years; 68% black; 96% Medicaid insurance<br><br>Number of participants in intervention and control groups NR; control group participants received a written appointment card only<br><br>Completed FU: n=205<br><br>Recruitment: approached at clinic | upcoming injection appointment and repeat phone calls were made if participants missed the appointment until they changed contraceptive methods, were lost to FU, or study completion<br><br>Variable intensity<br><br>Frequency: variable | (timely DMPA injections), increase continuation of use<br><br><u>Other:</u> barriers for clinics | between groups (data not shown).<br><br>Intervention did not improve DMPA continuation: 42.7% of intervention and 45.2% of control group continued DMPA through 12 months FU (RR=0.94, 95% CI=0.71, 1.25); although side effects were thought to be a reason for discontinuation, the percentage of women reporting side effects did not differ between those who chose to continue DMPA (82.0%) and those who did not (83.8%)<br><br>Intervention was more intensive than would be easily incorporated into most office settings | <u>Strengths:</u><br>Comparable study groups related to age, gravidity, parity, education and marital status<br><br>Continuation of use validated via clinic records<br><br>Randomization assignment was computer-generated<br>FU time ≥ 1 year<br><br><u>Weaknesses:</u><br>Selection bias<br><br>Participation rate unknown<br><br>Comparability between completers and noncompleters unknown<br><br>Investigator blinding NR<br><br>Possible study reactivity (outcome improves in participants who are aware of being observed) |
| Madlon-Kay (1996) <sup>12</sup><br><br>Funding source not stated | Retrospective cohort study (via chart review); 2 study groups               | 184 sexually active DMPA users aged 13–50 (mean age=23); 69% white, 21% black, 6% Hispanic; 86%                                                                                                                                                                            | Distribution of a wallet-sized reminder card containing the date of the next DMPA injection; a reminder postcard was also sent shortly before the                                                                                          | <u>Medium-term:</u> increase correct use of contraception (timely DMPA injections)               | Intervention was significantly ( $p<0.05$ ) associated with improvement in timeliness of DMPA injections; before the                                                                                                                                                                                                                                                                                                                                                                                                              | Level II-3; high risk for bias<br><br><u>Strengths:</u><br>Continuation of use validated via clinic records<br><br><u>Weaknesses:</u>                                                                                                                                                                                                                                                                                                                                                                                               |

**Appendix**  
**Impact of Reminder Systems in Clinical Settings to Improve Family Planning Outcomes: A Systematic Review**  
**Zapata et al.**

| Reference/<br>Funding | Design/Setting                                    | Population                                                                                                                                                                         | Intervention                                                             | Outcomes | Results                                                                                                                                                                                                                                                                 | Quality                                                                                                                    |
|-----------------------|---------------------------------------------------|------------------------------------------------------------------------------------------------------------------------------------------------------------------------------------|--------------------------------------------------------------------------|----------|-------------------------------------------------------------------------------------------------------------------------------------------------------------------------------------------------------------------------------------------------------------------------|----------------------------------------------------------------------------------------------------------------------------|
| U.S.                  | Family physician clinic, Minnesota<br>FU=3 months | receiving state medical assistance<br>Number of participants in intervention group and control group (who received no reminders) NR.<br>Recruitment: charts of DMPA users reviewed | upcoming injection appointment<br>Moderate intensity<br>Frequency: twice |          | intervention, 64% of injections were received on time, while 76% of injections were received on time after the intervention was instituted.<br><br>The mean number of days late for an injection significantly ( $p<0.05$ ) decreased from 20 days late to 8 days late. | Comparability between study groups unknown (potential for confounding errors)<br><br>Short FU time for behavioral outcomes |

*Note:* Intensity of intervention defined as low (intervention took place during a single visit), moderate (intervention took place during more than one visit, but less than weekly), or high (intervention took place weekly).  
CT, prospective nonrandomized controlled trial; DMPA, depot medroxyprogesterone acetate; FU, follow-up; HS, high school; NR, not reported; NYC, New York City; NH, non-Hispanic; NR, not reported; OC, oral contraceptive; RR, relative risk.
